# Supplementary material for: Impact of increasing morphological information by micro-CT scanning on the phylogenetic placement of Darwin wasps (Hymenoptera, Ichneumonidae) in amber
Source: PubMed Central journal article supplement (PMC10624732; doi:10.1186/s13358-023-00294-2), 2023-11-03

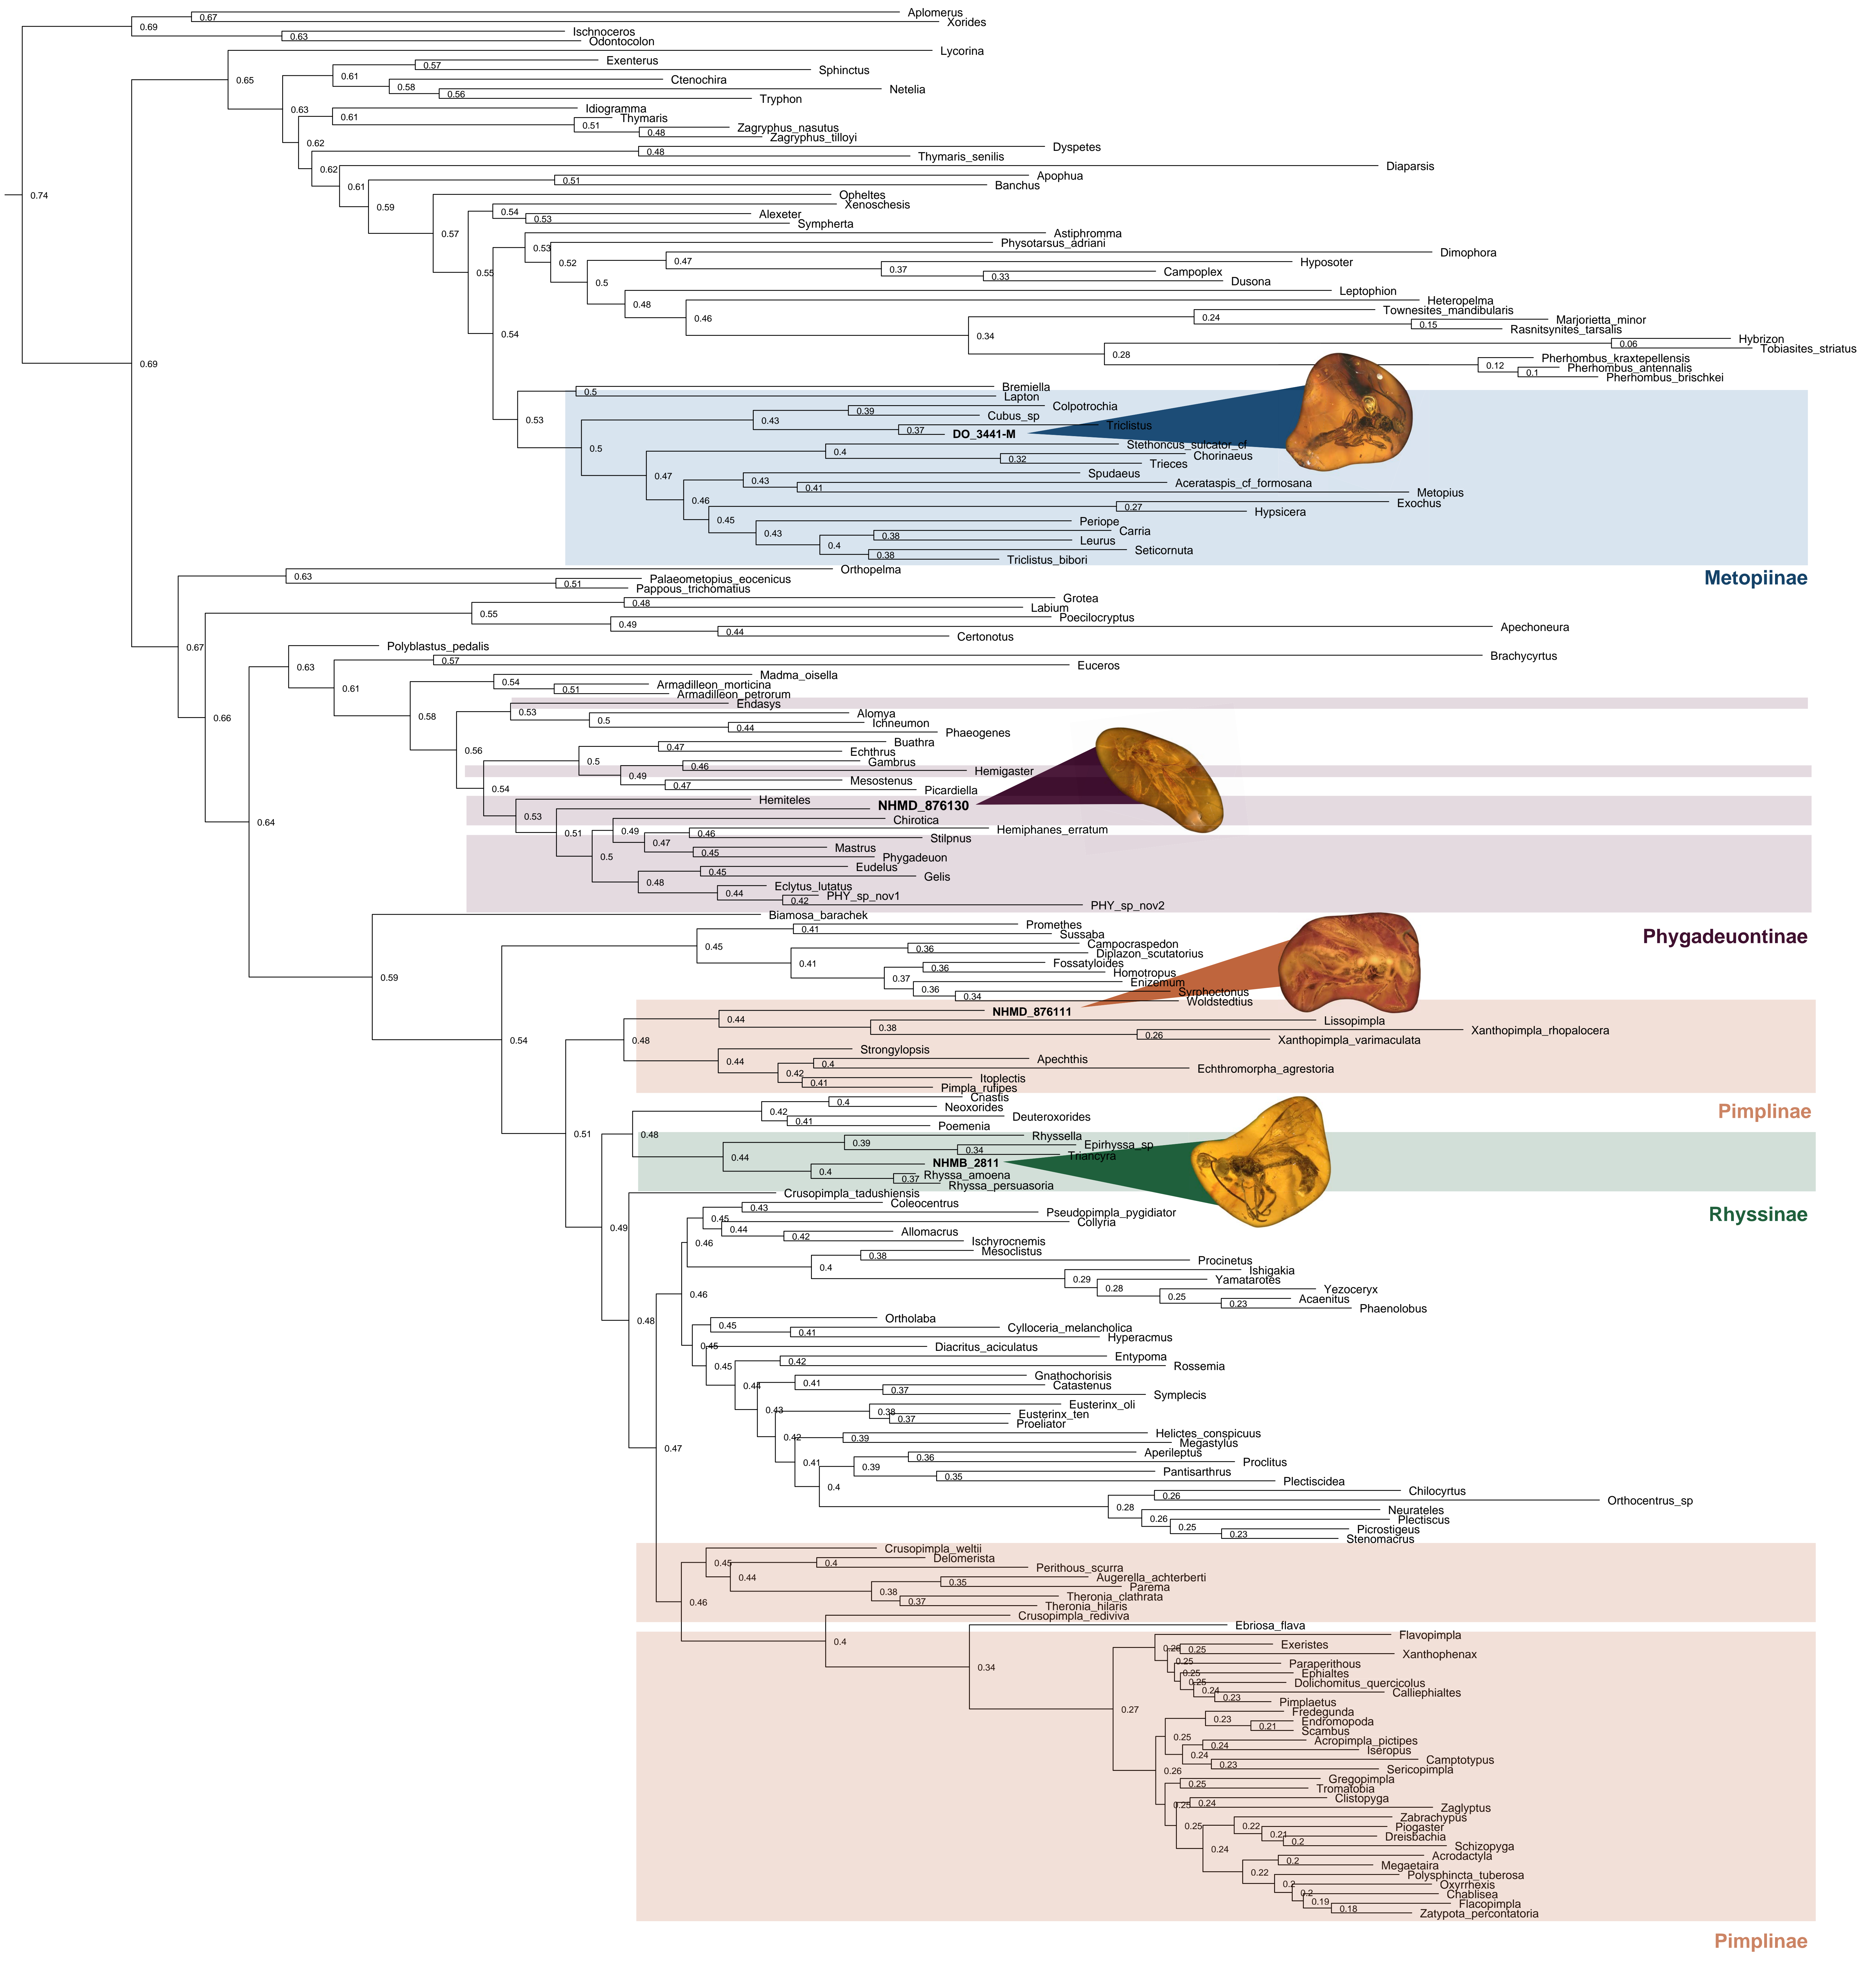

Supplement: 13358_2023_294_MOESM6_ESM.pdf [file 13358_2023_294_MOESM6_ESM.pdf]
